# Supplementary material
Source: PubMed Central journal article supplement (PMC1976344)

**A**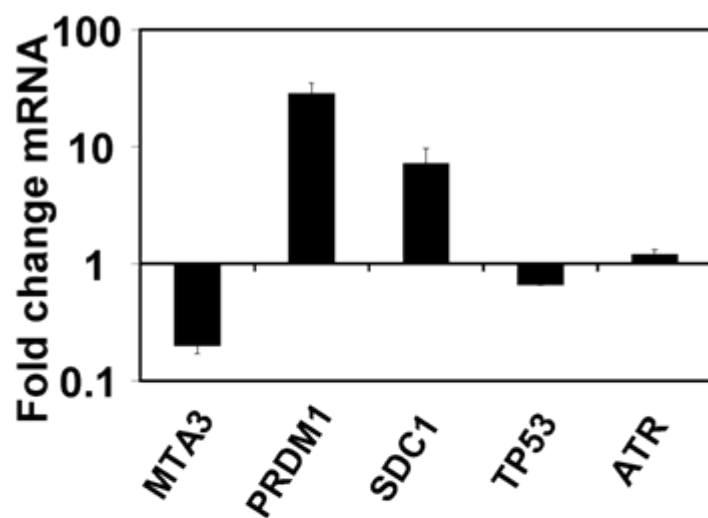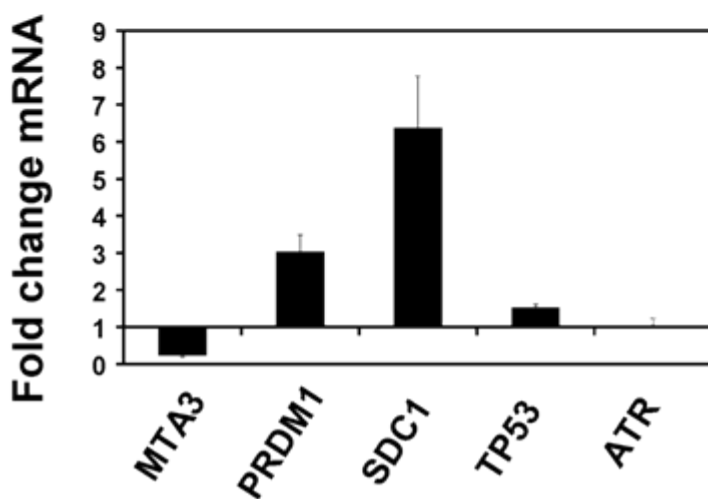**B**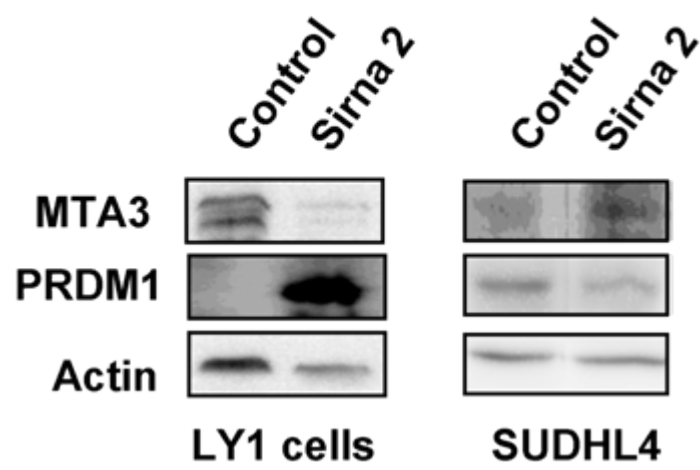

**C****Anti- MTA3  
Sequence 2****Control****MTA3**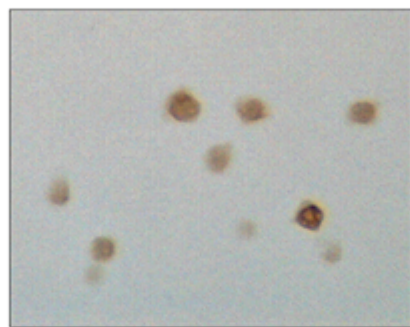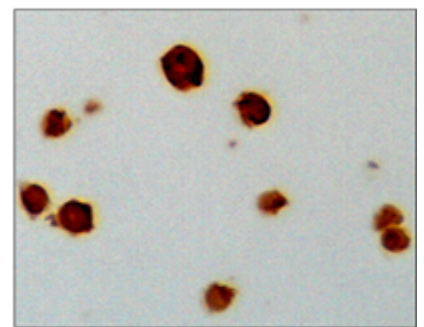**PRDM1**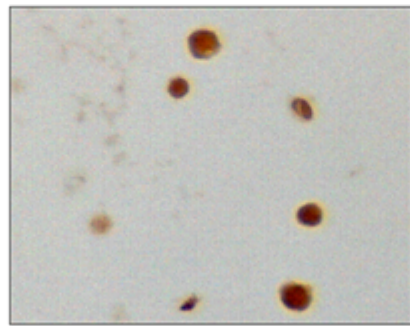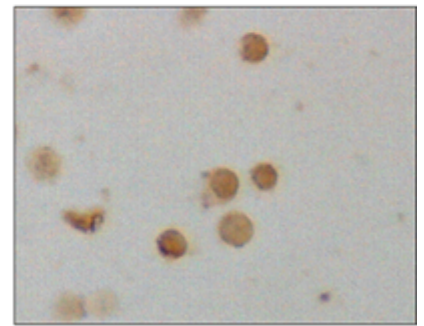**KAPPA**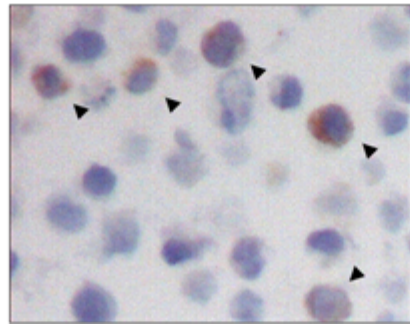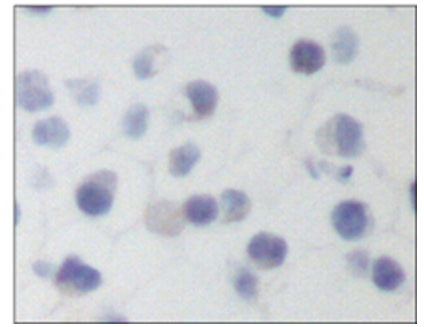

**D**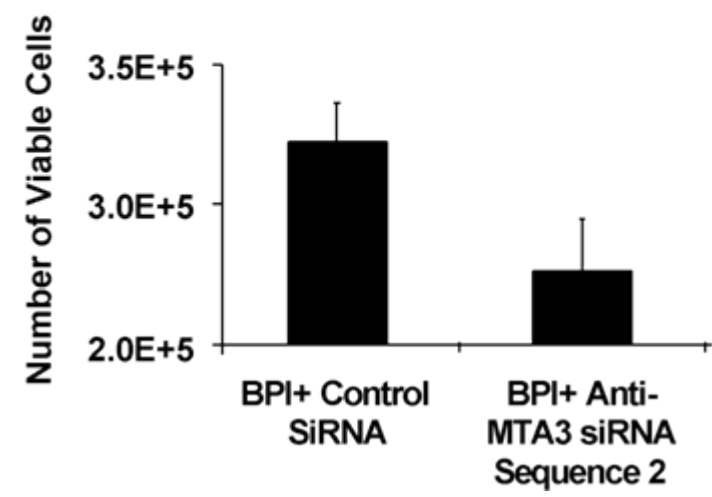

Supplement: blood_blood-2007-01-069575_1.pdf [file blood_blood-2007-01-069575_1.pdf]

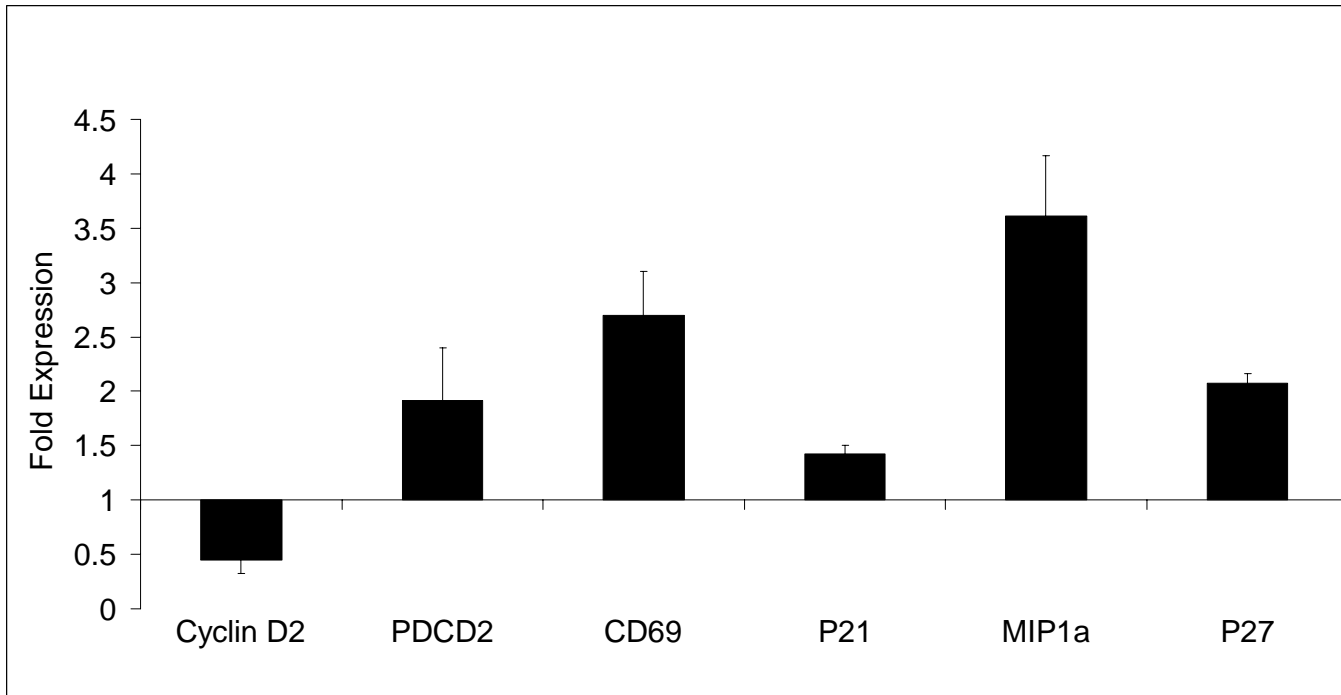

Supplement: blood_blood-2007-01-069575_2.pdf [file blood_blood-2007-01-069575_2.pdf]

**MTA3**

**PRDM1**

**Kappa**

**MTA3 siRNA**

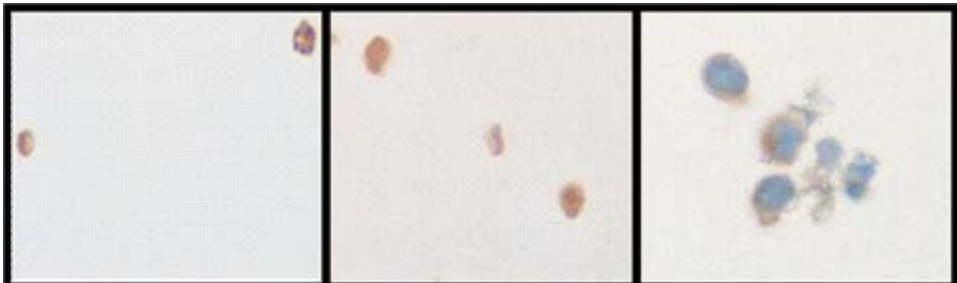

**Control siRNA**

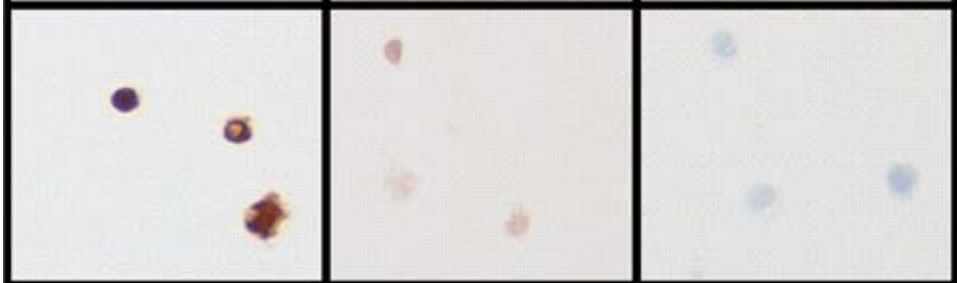

Supplement: blood_blood-2007-01-069575_3.pdf [file blood_blood-2007-01-069575_3.pdf]
